# Supplementary material for: Two octamolybdate-based complexes: hydrothermal synthesis, structural characterization and properties
Source: Royal Society of Chemistry journal article supplement (doi:10.1039/c3ce41706a), 2013-10-11
Supplement: c3ce41706a.pdf [file c3ce41706a.pdf]

## Two Octamolybdate-Based Complexes: Hydrothermal Synthesis, Structural Characterization and Properties

Xiao Xu, Weiwei Ju, Wentao Hou and Yan Xu<sup>1\*</sup>

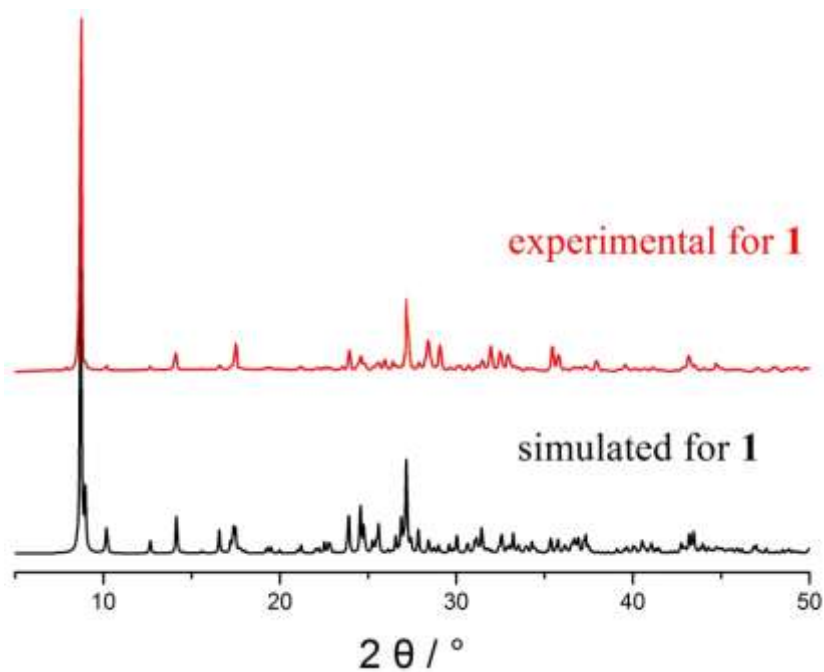

**Fig. S1** The simulated and experimental powder X-ray diffraction patterns for compounds **1**.

---

\*College of Chemistry and Chemical Engineering, State Key Laboratory of Materials-oriented Chemical Engineering, Nanjing University of Technology, Nanjing 210009, P.R. China. E-mail: yanxu@njut.edu.cn; Tel: +86-25-83587857

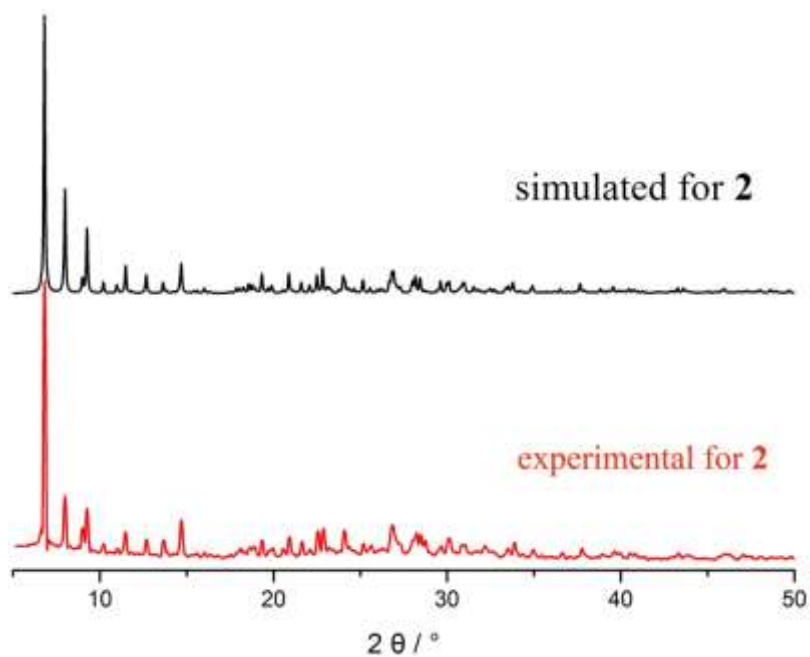

**Fig. S2** The simulated and experimental powder X-ray diffraction patterns for compounds 2.

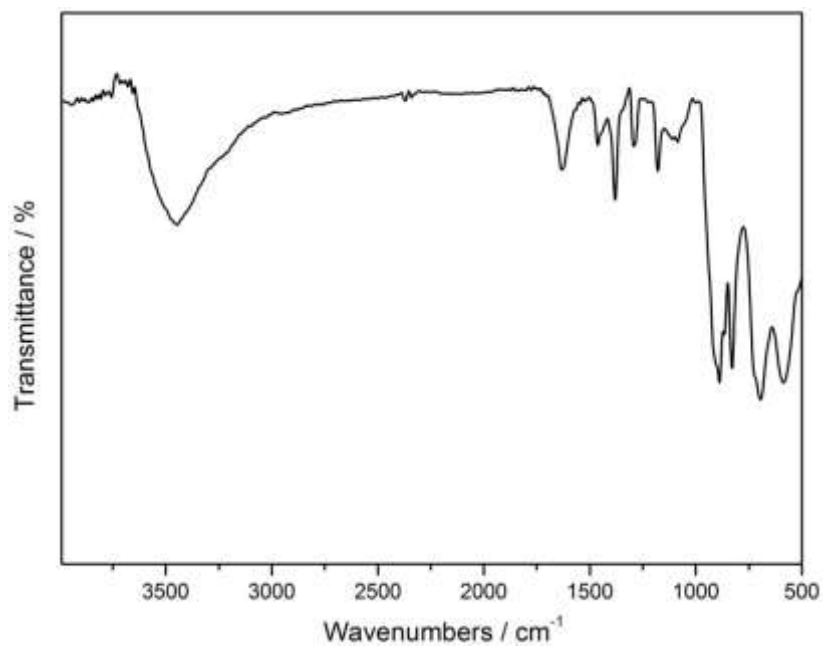

**Figure. S3** The IR spectra of compound 1.

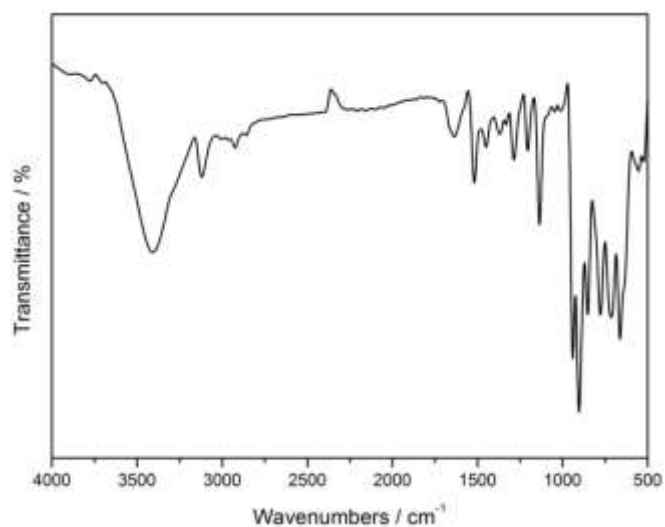

**Fig. S4** The IR spectra of compound **2**.

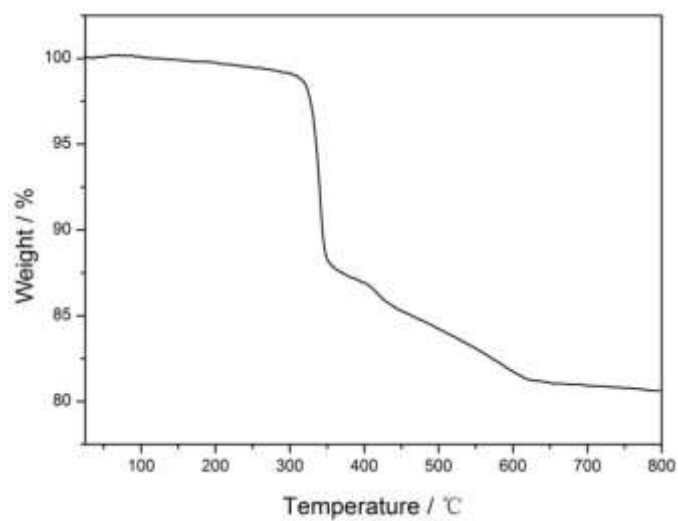

**Fig. S5** The TG curve of compound **1**.

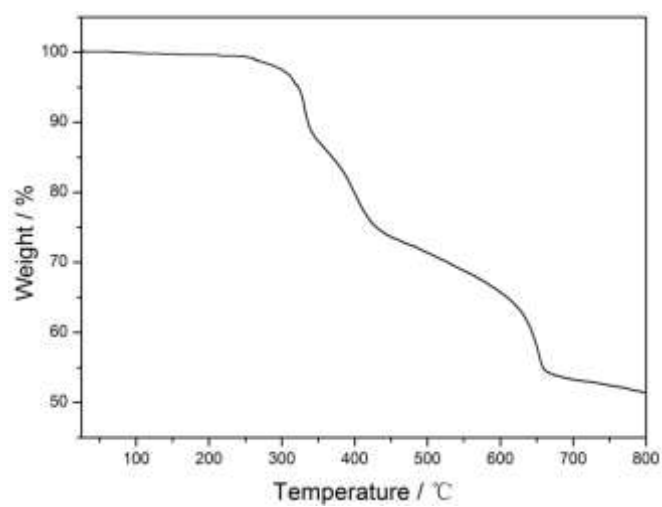

**Fig. S6** The TG curve of compound **2**.

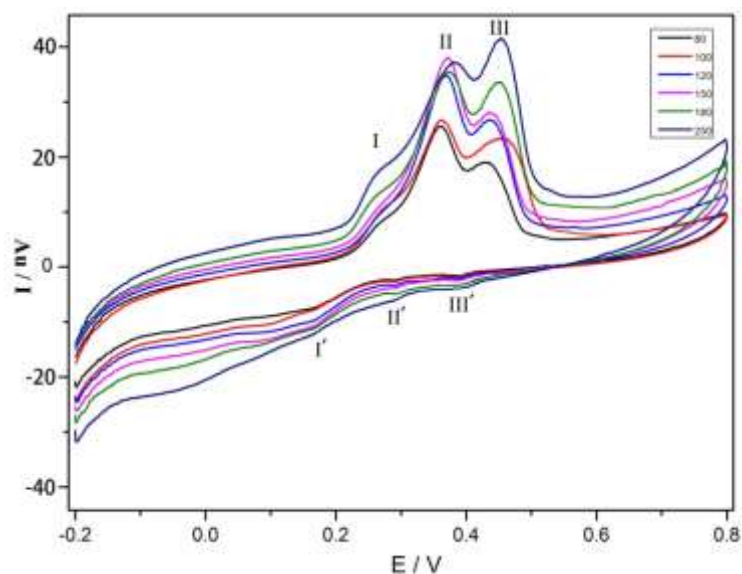

**Fig. S7** Cyclic voltammograms of the 2-CPE in 1 M H<sub>2</sub>SO<sub>4</sub> aqueous solution at different scan rates (from inner to outer: 80, 100, 120, 150, 180, 250 mV s<sup>-1</sup>).

**Table. S1** Selected bonds distances (Å) for **1**

|               |           |               |           |               |           |
|---------------|-----------|---------------|-----------|---------------|-----------|
| Mo(1)-O(2)    | 1.71(2)   | Mo(4)-O(10)#1 | 2.32(2)   | O(8)-Ag(3)#7  | 2.41(2)   |
| Mo(1)-O(14)   | 1.758(17) | Mo(4)-O(7)    | 2.342(18) | O(10)-Mo(4)#1 | 2.32(2)   |
| Mo(1)-O(10)   | 1.93(2)   | Ag(3)-N(1)#2  | 2.41(2)   | O(13)-Ag(1)#8 | 2.407(18) |
| Mo(1)-O(4)    | 1.934(16) | Ag(3)-O(2W)   | 2.41(2)   | O(14)-Mo(2)#1 | 2.33(2)   |
| Mo(1)-O(7)    | 2.195(16) | Ag(3)-O(8)#3  | 2.41(2)   | S(2)-C(3)     | 1.77(3)   |
| Mo(1)-O(7)#1  | 2.324(18) | Ag(3)-S(2)    | 2.609(6)  | S(2)-Ag(1)#5  | 2.722(7)  |
| Mo(1)-Mo(3)   | 3.210(3)  | Ag(4)-N(3)    | 2.21(2)   | S(1)-C(1)     | 1.68(2)   |
| Mo(2)-O(1)    | 1.721(19) | Ag(4)-N(2)#2  | 2.349(19) | N(8)-C(3)     | 1.28(4)   |
| Mo(2)-O(8)    | 1.75(2)   | Ag(4)-S(2)    | 2.492(7)  | N(8)-N(5)     | 1.30(4)   |
| Mo(2)-O(5)    | 1.89(2)   | Ag(4)-Ag(1)   | 2.961(3)  | N(8)-C(4)     | 1.45(4)   |
| Mo(2)-O(9)    | 1.937(19) | Ag(1)-O(13)#4 | 2.407(18) | N(7)-C(3)     | 1.31(3)   |
| Mo(2)-O(14)#1 | 2.33(2)   | Ag(1)-S(1)    | 2.589(7)  | N(7)-N(6)     | 1.33(3)   |
| Mo(3)-O(6)    | 1.679(19) | Ag(1)-O(11)   | 2.594(19) | N(3)-C(1)     | 1.36(3)   |
| Mo(3)-O(13)   | 1.695(18) | Ag(1)-S(2)#5  | 2.722(7)  | N(3)-N(2)     | 1.37(3)   |
| Mo(3)-O(9)    | 1.908(17) | Ag(1)-S(2)    | 2.769(7)  | N(6)-N(5)     | 1.31(3)   |
| Mo(3)-O(10)   | 2.021(17) | Ag(1)-Ag(2)   | 2.941(4)  | N(6)-Ag(2)#6  | 2.41(2)   |
| Mo(3)-O(7)    | 2.236(17) | Ag(1)-Ag(1)#5 | 3.148(5)  | N(4)-N(1)     | 1.35(3)   |
| Mo(3)-O(4)#1  | 2.328(18) | Ag(2)-N(7)    | 2.21(2)   | N(4)-C(1)     | 1.40(3)   |
| Mo(4)-O(3)    | 1.707(18) | Ag(2)-N(6)#6  | 2.41(2)   | N(4)-C(2)     | 1.44(3)   |
| Mo(4)-O(11)   | 1.711(19) | Ag(2)-S(1)    | 2.504(9)  | N(2)-N(1)     | 1.29(3)   |
| Mo(4)-O(5)    | 1.92(2)   | O(4)-Mo(3)#1  | 2.328(18) | N(2)-Ag(4)#2  | 2.349(19) |
| Mo(4)-O(4)    | 2.028(16) | O(7)-Mo(1)#1  | 2.324(18) | N(1)-Ag(3)#2  | 2.41(2)   |

Symmetry transformations used to generate equivalent atoms:

#1 -x+2,-y+1,-z; #2 -x+1,-y-1,-z; #3 x-1,y-1,z-1; #4 x-1,y-1,z; #5 -x+1,-y,-z; #6  
 -x+2,-y,-z; #7 x+1,y+1,z+1; #8 x+1,y+1,z

**Table. S2** Selected bonds distances (Å) for **2**

|                 |            |               |           |               |           |
|-----------------|------------|---------------|-----------|---------------|-----------|
| Ag(1)-N(2)      | 2.143(6)   | Mo(4)-O(9)    | 2.111(8)  | N(1)-C(17)    | 1.317(10) |
| Ag(1)-N(6)#1    | 2.150(6)   | Mo(4)-O(3)    | 2.367(10) | N(1)-Ag(2A)#3 | 2.266(7)  |
| Ag(1)-O(7)#2    | 2.512(10)  | Mo(5)-O(1)    | 0.800(16) | N(6)-C(16)    | 1.319(11) |
| Ag(2A)-Ag(2A)#3 | 0.600(3)   | Mo(5)-O(23)   | 1.680(15) | N(6)-C(15)    | 1.332(11) |
| Ag(2A)-N(1)     | 2.076(7)   | Mo(5)-O(22)   | 1.726(14) | N(6)-Ag(1)#1  | 2.150(6)  |
| Ag(2A)-N(1)#3   | 2.266(7)   | Mo(5)-O(16)   | 1.912(10) | N(5)-C(16)    | 1.304(10) |
| Ag(2A)-O(22)    | 2.471(12)  | Mo(5)-O(9)    | 2.089(7)  | N(5)-N(4)     | 1.358(10) |
| Ag(2A)-O(9)     | 2.504(8)   | Mo(5)-O(15)   | 2.207(10) | N(5)-C(12)    | 1.484(10) |
| Ag(2A)-Mo(5)    | 3.000(3)   | Mo(5)-O(2)    | 2.243(15) | C(2)-C(3)     | 1.386(11) |
| Ag(3)-Ag(3)#4   | 1.155(4)   | Mo(5)-O(19)#7 | 2.267(10) | C(2)-C(1)     | 1.397(13) |
| Ag(3)-N(8)#5    | 2.125(10)  | Mo(5)-O(17)#7 | 2.391(10) | C(2)-C(11)    | 1.525(13) |
| Ag(3)-N(8)#6    | 2.284(13)  | Mo(5)-O(18)   | 2.450(10) | C(3)-C(4)     | 1.393(13) |
| Mo(1)-O(7)      | 1.601(10)  | Mo(5)-Mo(7)   | 3.218(2)  | C(3)-C(8)     | 1.517(13) |
| Mo(1)-O(21)     | 1.638(11)  | Mo(3)-O(9)    | 1.616(8)  | C(12)-C(4)    | 1.513(11) |
| Mo(1)-O(17)     | 1.632(9)   | Mo(3)-O(14)   | 1.693(10) | C(1)-C(6)     | 1.392(13) |
| Mo(1)-O(10)     | 1.869(6)   | Mo(3)-O(6)    | 1.686(15) | C(1)-C(7)     | 1.555(12) |
| Mo(1)-O(13)     | 1.911(11)  | Mo(3)-O(11)   | 1.867(12) | N(4)-C(15)    | 1.303(12) |
| Mo(1)-O(19)     | 1.897(9)   | Mo(3)-O(3)    | 1.990(9)  | C(6)-C(5)     | 1.403(12) |
| Mo(1)-O(18)     | 2.002(9)   | Mo(3)-O(13)   | 2.169(11) | C(6)-C(10)    | 1.549(13) |
| Mo(1)-O(3)      | 2.084(10)  | Mo(3)-O(20)   | 2.291(13) | C(4)-C(5)     | 1.414(13) |
| Mo(1)-O(18)#7   | 2.482(9)   | Mo(3)-O(18)   | 2.328(9)  | C(5)-C(9)     | 1.546(15) |
| Mo(1)-Mo(2)     | 2.9958(17) | Mo(3)-O(24)   | 2.393(18) | N(9)-C(14)    | 1.327(14) |
| Mo(1)-Mo(3)     | 3.2214(16) | Mo(3)-O(10)#7 | 2.501(7)  | N(9)-N(7)     | 1.342(16) |
| Mo(2)-O(15)     | 1.517(10)  | Mo(7)-O(16)   | 1.520(10) | N(9)-C(10)    | 1.483(12) |
| Mo(2)-O(4)      | 1.705(10)  | Mo(7)-O(8)    | 1.594(6)  | N(8)-C(13)    | 1.27(3)   |
| Mo(2)-O(10)     | 1.760(7)   | Mo(7)-O(12)   | 1.698(11) | N(8)-C(14)    | 1.33(2)   |
| Mo(2)-O(8)      | 1.809(6)   | Mo(7)-O(11)#7 | 1.948(12) | N(8)-Ag(3)#5  | 2.125(10) |
| Mo(2)-O(16)     | 1.919(10)  | Mo(7)-O(15)   | 1.928(10) | N(8)-Ag(3)#8  | 2.284(13) |
| Mo(2)-O(18)     | 2.351(9)   | Mo(7)-O(3)#7  | 1.940(10) | C(14)-C(13)   | 2.05(3)   |
| Mo(2)-O(17)#7   | 2.346(9)   | Mo(7)-O(17)#7 | 2.322(9)  | N(7)-C(13)    | 1.35(2)   |
| Mo(2)-O(3)#7    | 2.403(10)  | Mo(7)-O(10)   | 2.493(7)  | O(19)-O(17)   | 1.749(14) |
| Mo(2)-Mo(6)     | 3.0015(19) | O(1)-O(22)    | 0.941(16) | O(19)-Mo(5)#7 | 2.267(10) |
| Mo(6)-O(23)     | 1.289(15)  | O(2)-O(23)    | 0.765(15) | O(18)-O(17)#7 | 1.177(13) |
| Mo(6)-O(1)      | 1.704(17)  | O(3)-O(11)    | 0.962(14) | O(18)-O(13)   | 1.525(14) |
| Mo(6)-O(2)      | 1.698(14)  | O(3)-Mo(7)#7  | 1.940(10) | O(18)-Mo(1)#7 | 2.482(9)  |
| Mo(6)-O(15)     | 1.906(9)   | O(3)-Mo(2)#7  | 2.403(10) | O(17)-O(18)#7 | 1.177(13) |
| Mo(6)-O(9)      | 1.930(6)   | O(4)-O(15)    | 1.605(15) | O(17)-Mo(6)#7 | 2.334(10) |
| Mo(6)-O(18)     | 1.943(9)   | O(6)-O(24)    | 0.749(16) | O(17)-Mo(7)#7 | 2.322(9)  |
| Mo(6)-O(16)     | 2.188(11)  | O(7)-O(21)    | 1.092(15) | O(17)-Mo(2)#7 | 2.346(9)  |

---

|               |           |               |           |               |           |
|---------------|-----------|---------------|-----------|---------------|-----------|
| Mo(6)-O(13)   | 2.262(11) | O(7)-Ag(1)#2  | 2.512(10) | O(17)-Mo(5)#7 | 2.391(10) |
| Mo(6)-O(17)#7 | 2.334(10) | O(10)-Mo(3)#7 | 2.501(7)  | O(16)-O(15)   | 1.332(15) |
| Mo(4)-O(6)    | 1.067(14) | N(3)-C(18)    | 1.320(10) | O(16)-O(12)   | 1.502(16) |
| Mo(4)-O(14)   | 1.637(11) | N(3)-N(1)     | 1.364(9)  | O(14)-O(20)   | 1.226(17) |
| Mo(4)-O(20)   | 1.684(14) | N(3)-C(11)    | 1.483(10) | O(11)-Mo(7)#7 | 1.948(12) |
| Mo(4)-O(24)   | 1.722(19) | N(2)-C(18)    | 1.332(10) |               |           |
| Mo(4)-O(11)   | 1.852(12) | N(2)-C(17)    | 1.351(10) |               |           |

---

Symmetry transformations used to generate equivalent atoms:

#1 -x,-y+2,-z+2; #2 -x,-y+1,-z+2; #3 -x+1,-y+1,-z+2; #4 -x+1,-y,-z+3; #5 -x,-y,-z+3;

#6 x+1,y,z; #7 -x+1,-y,-z+2; #8 x-1,y,z
